# Supplementary material for: Shape and Composition Evolution in an Alloy Core–Shell Nanowire Heterostructure Induced by Adatom Diffusion
Source: MDPI journal article supplement (doi:10.3390/nano13111732), 2023-05-25
Supplement: s1 [file s1]

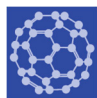

## Article

# Shape and composition evolution in alloy core-shell nanowire heterostructure induced by adatom diffusion

Delong Han <sup>1#</sup>, Wenlei Tang <sup>2#</sup>, Naizhang Sun <sup>2</sup>, Han Ye <sup>2</sup>, Hongyu Chai <sup>3\*</sup> and Mingchao Wang <sup>4\*</sup>

<sup>1</sup> Shandong Computer Science Center (National Supercomputer Center in Jinan), Qilu University of Technology (Shandong Academy of Sciences), Jinan 250014, China; handl@qlu.edu.cn (D.H.)

<sup>2</sup> State Key Laboratory of Information Photonics and Optical Communications, Beijing University of Posts and Telecommunications, Beijing 100876, China; tang2021110591@bupt.edu.cn (W.T.); snz@bupt.edu.cn (N.S.); Han\_ye@bupt.edu.cn (H.Y.)

<sup>3</sup> Key Laboratory of Semiconductor Materials Science, Beijing Key Laboratory of Low Dimensional Semiconductor Materials and Devices, Institute of Semiconductors, Chinese Academy of Sciences, Beijing 100083, China

<sup>4</sup> Centre for Theoretical and Computational Molecular Science, Australian Institute for Bioengineering and Nanotechnology, The University of Queensland, St Lucia, QLD 4072, Australia

<sup>#</sup>These authors contribute equally

\* Correspondence: mingchao.wang@uq.edu.au (Dr. M. Wang); chaihongyu@semi.ac.cn (Dr. H. Chai).

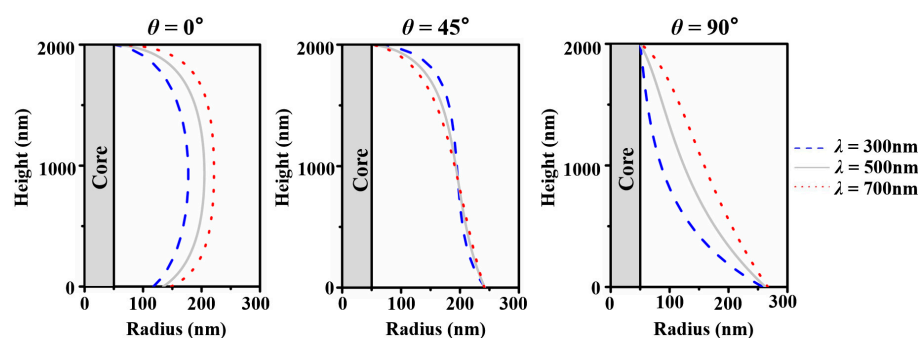

**Figure S1.** Relation between the shape of core-shell nanowire heterostructure and diffusion length of adatoms (component A). The growth time is set 300s.

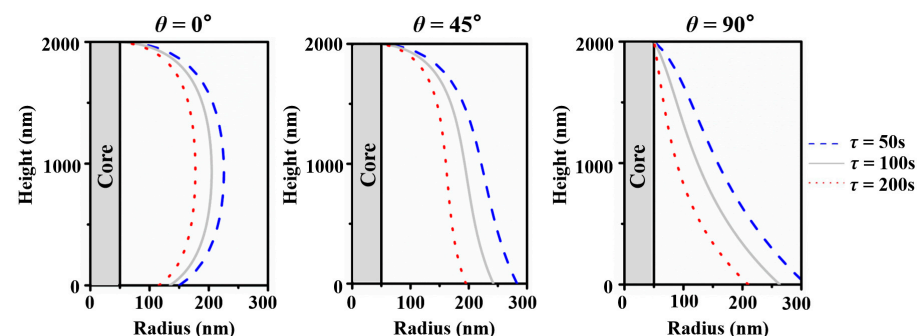

**Figure S2.** Relation between the shape of core-shell nanowire heterostructure and the lifetime of adatoms (component A). The growth time is set 300s.

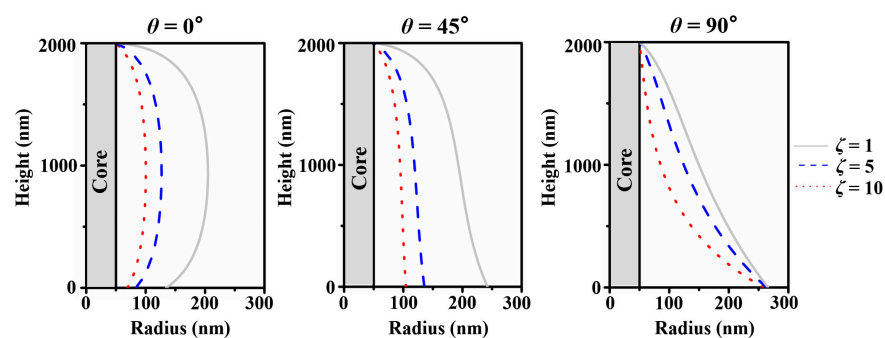

**Figure S3.** Relation between the shape of core-shell nanowire heterostructure and the parameter  $\zeta$ . The growth time is set 300s.

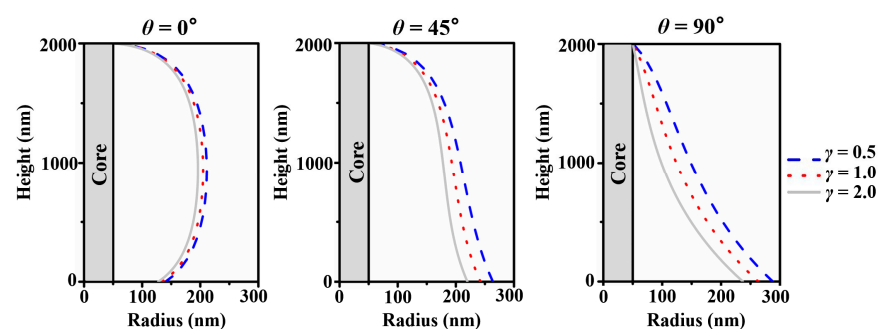

**Figure S4.** Relation between the shape of core-shell nanowire heterostructure and the parameter  $\gamma$ . The growth time is set 300s.

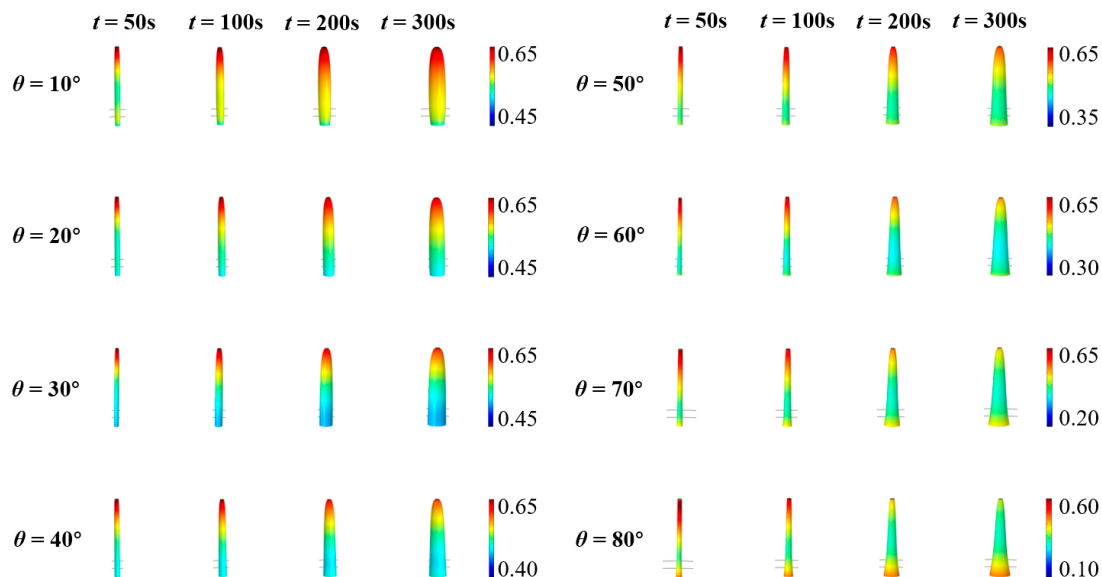

**Figure S5.** Snapshots of surface composition of core-shell nanowire heterostructures during growth process with different impingement beam angles.
